# Supplementary material
Source: PubMed Central journal article supplement (PMC10655861)

Full unedited blots for Figure 1C

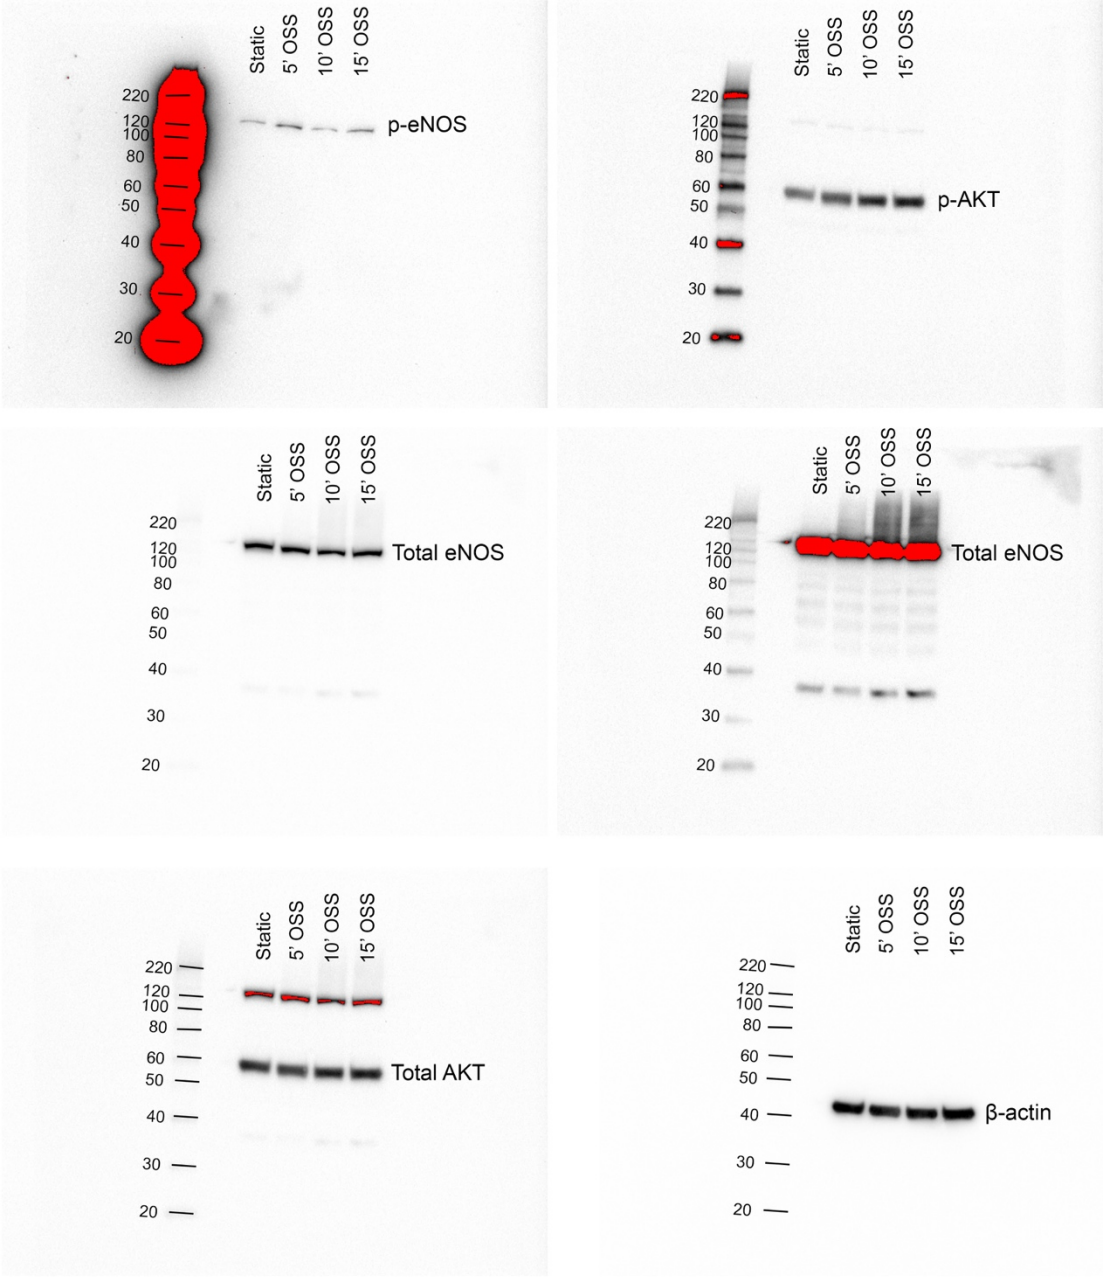

Full unedited blots for Figure 1D

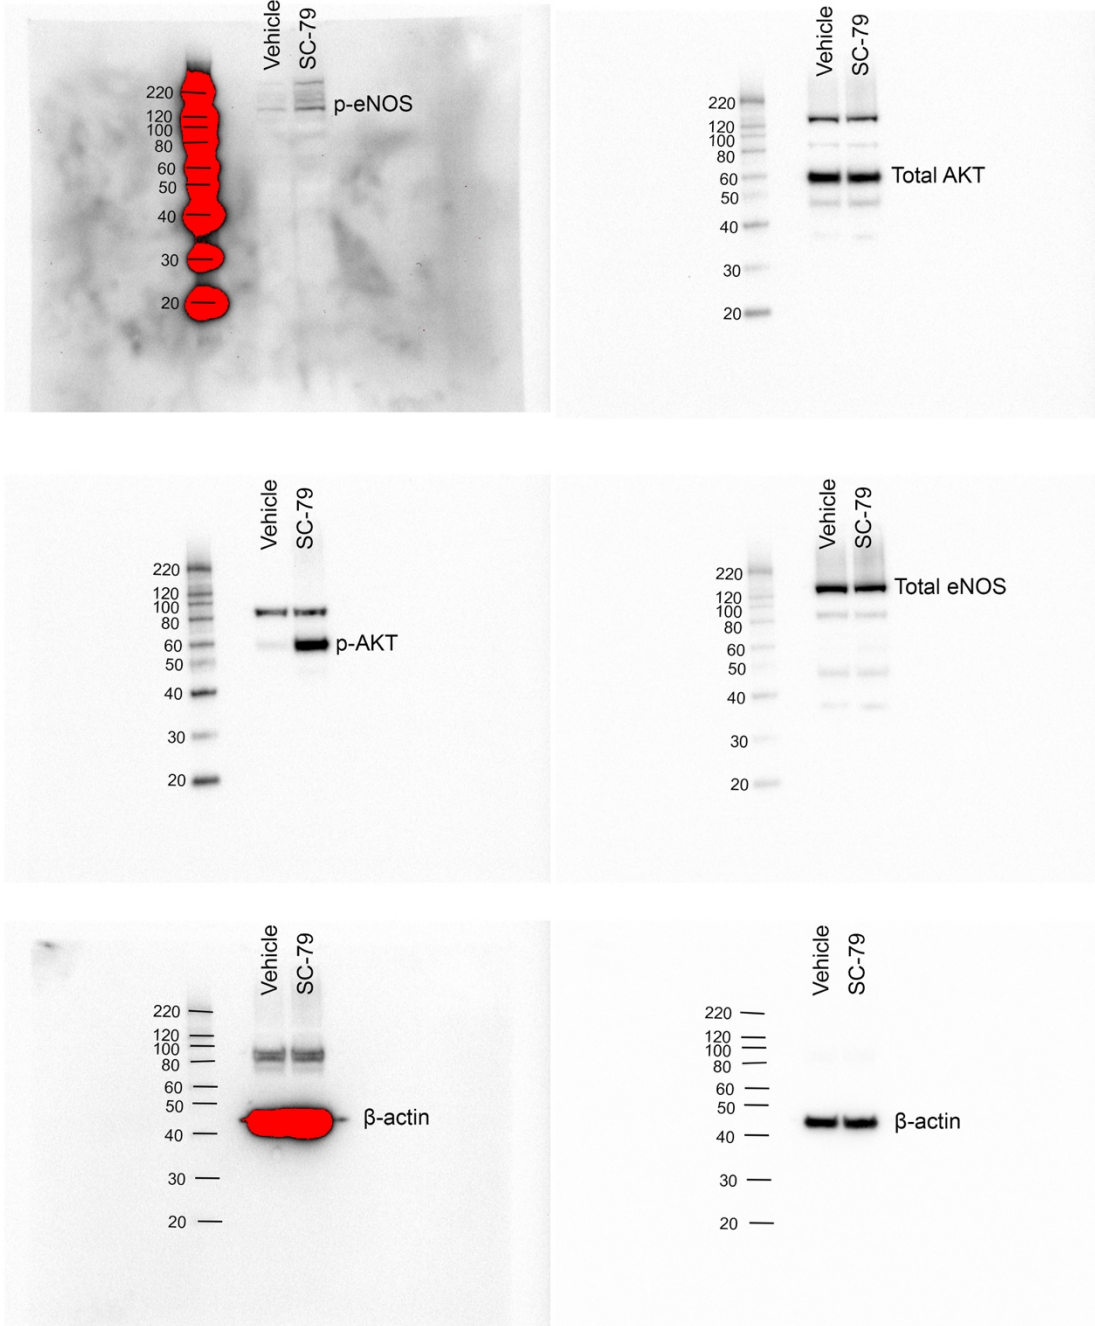

Full unedited blots for Figure 4C and for quantification in Figure 4D

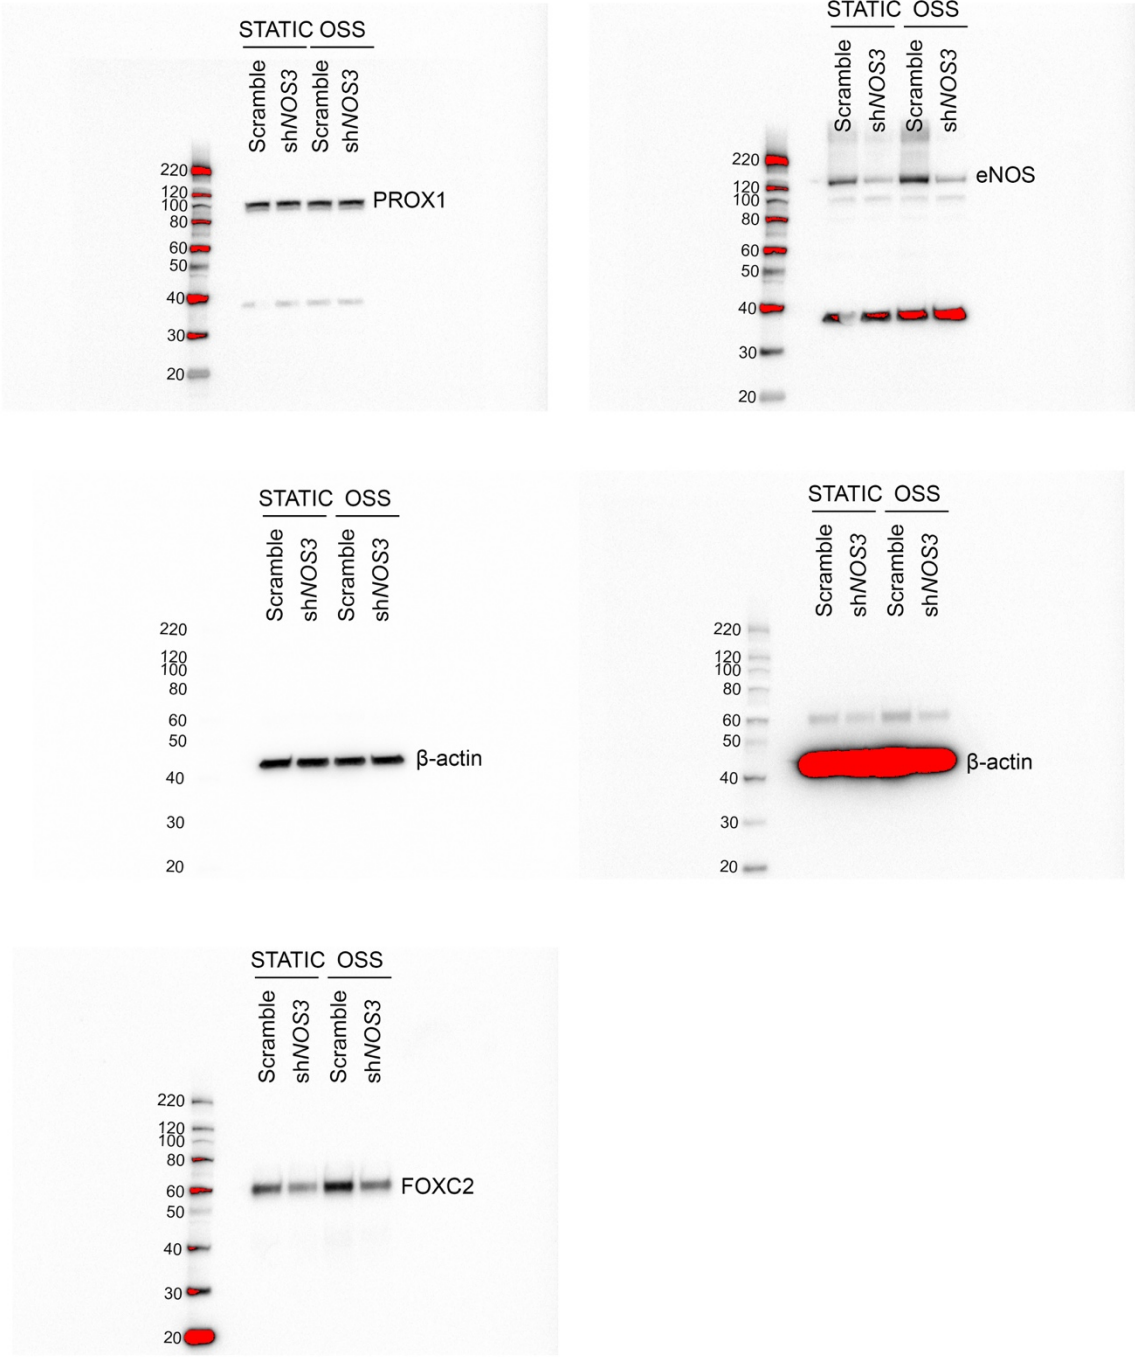

Full unedited blots for Figure 5C and for quantification in Figure 5D

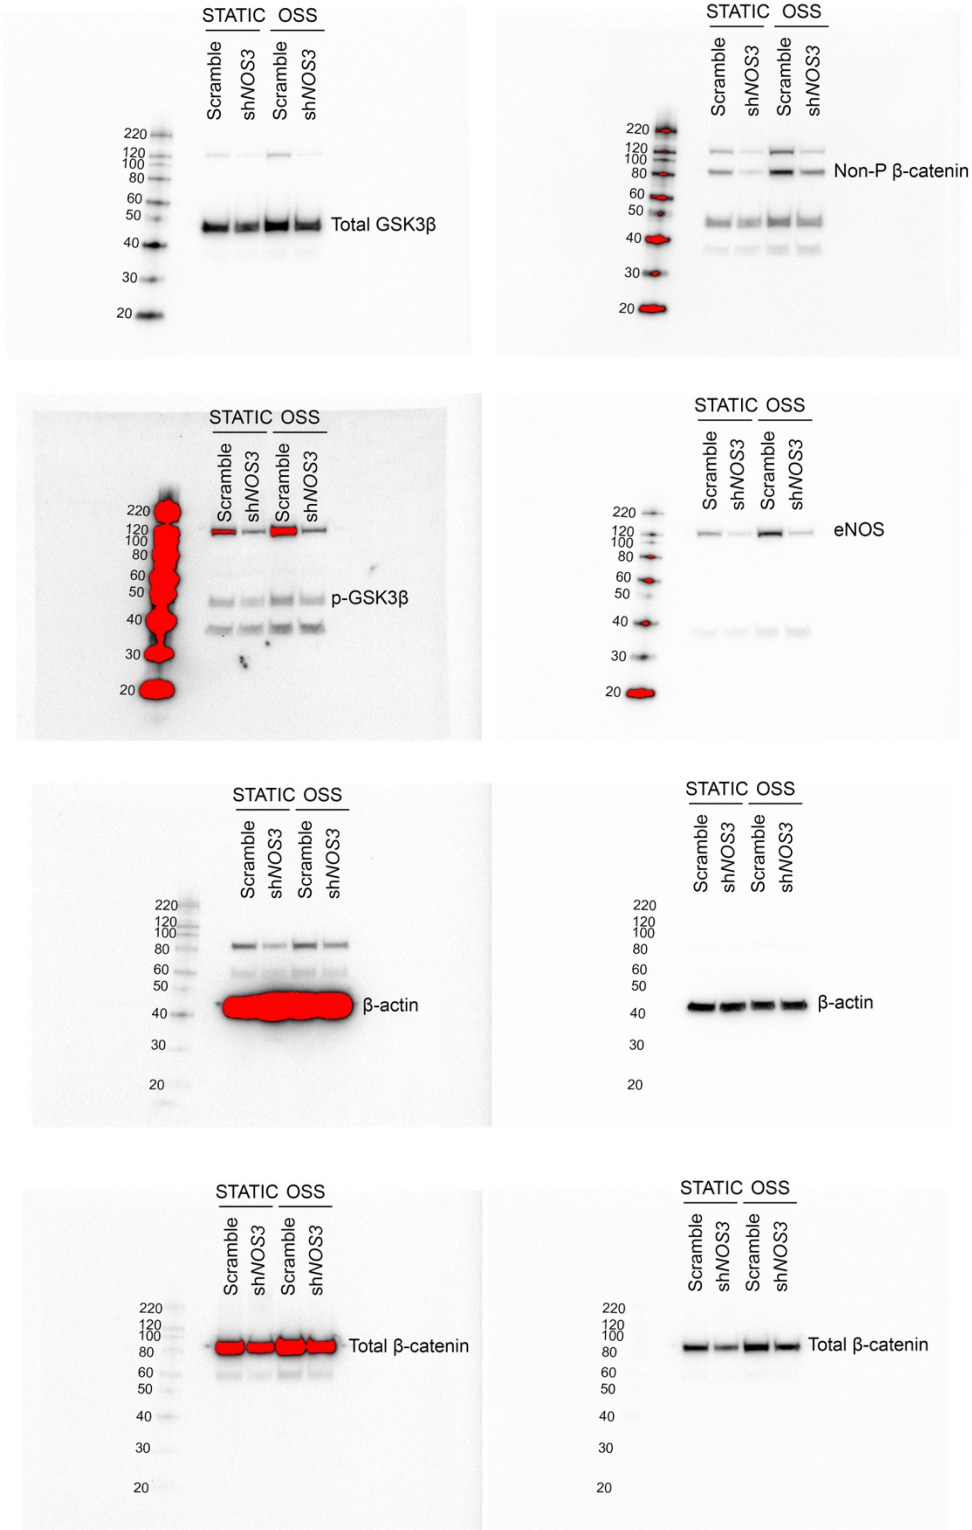

# Full unedited blots for Figure 5E

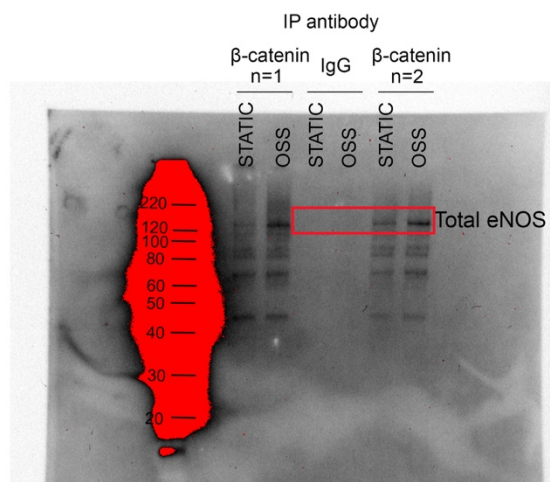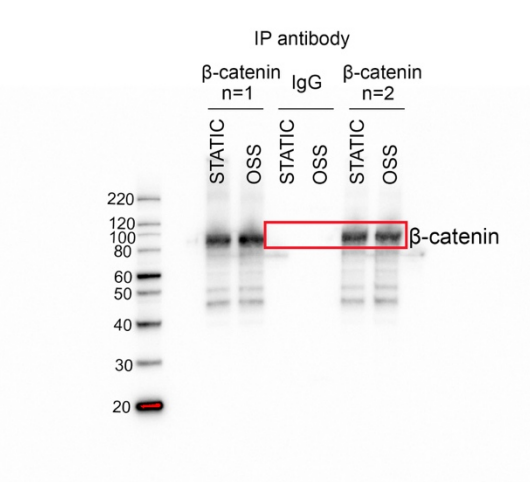

Full unedited blots for quantification in Figure 4D and Figure 5D (n=2)

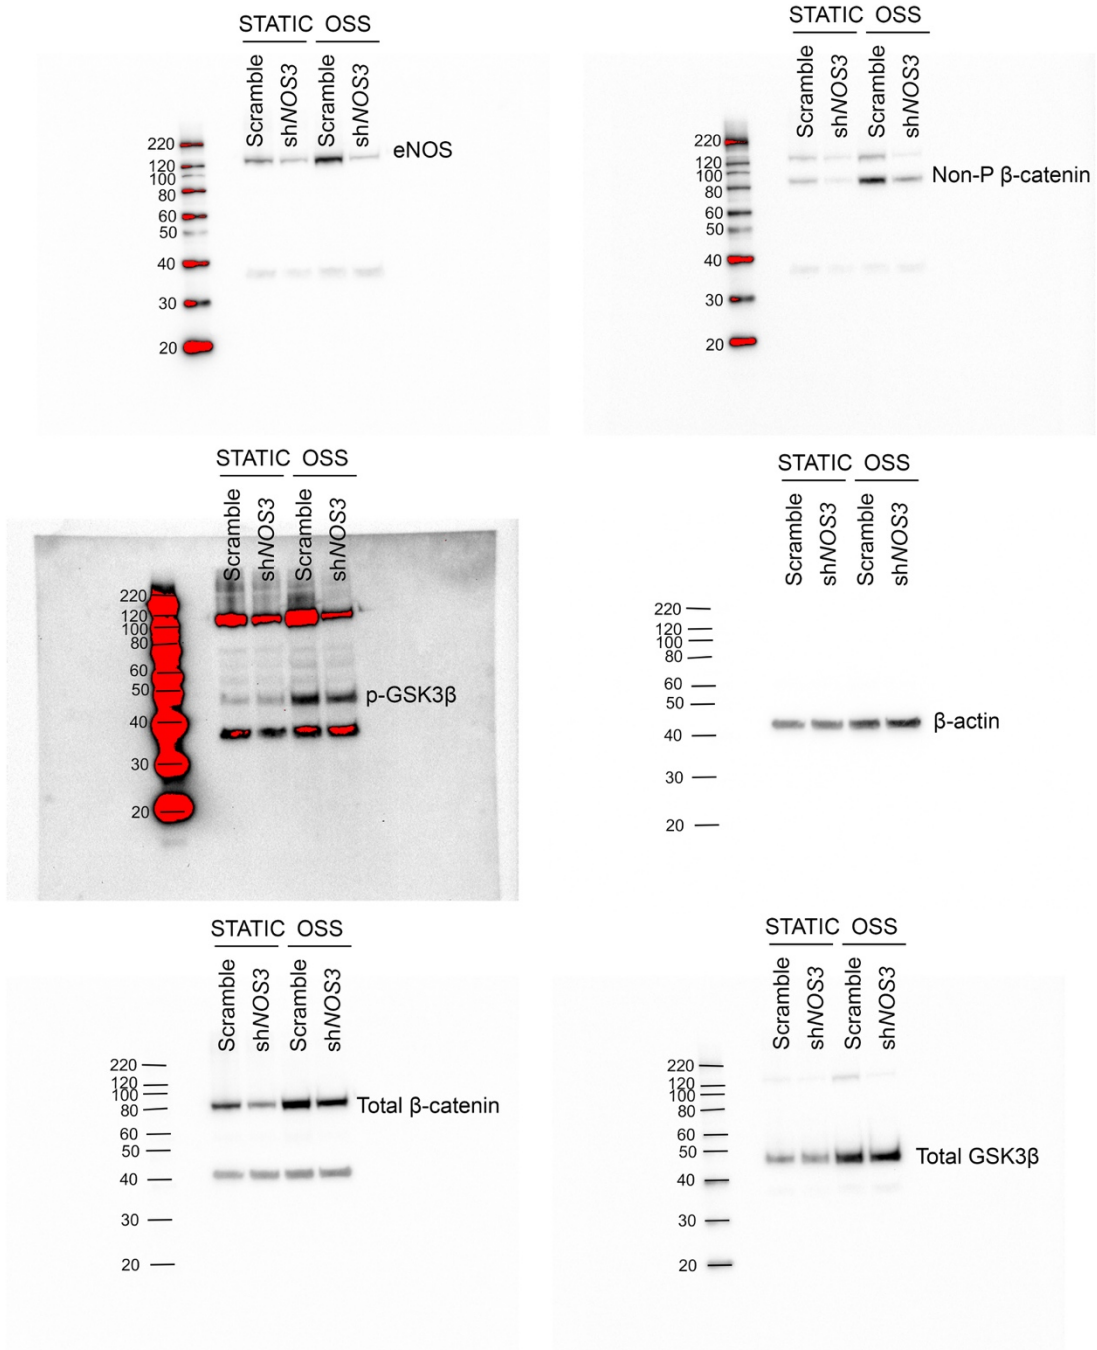

Full unedited blots for quantification in Figure 4D and Figure 5D (n=3)

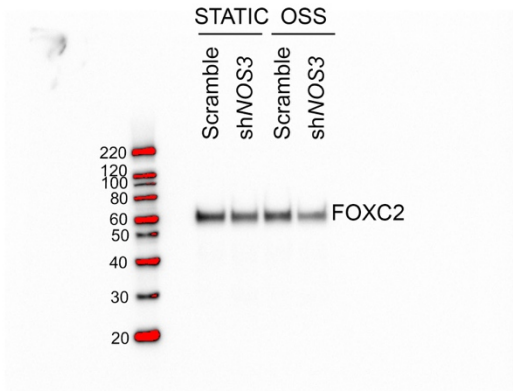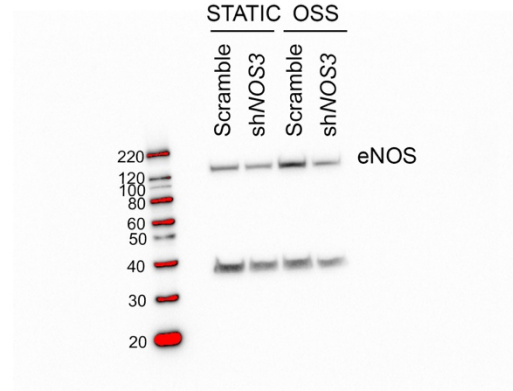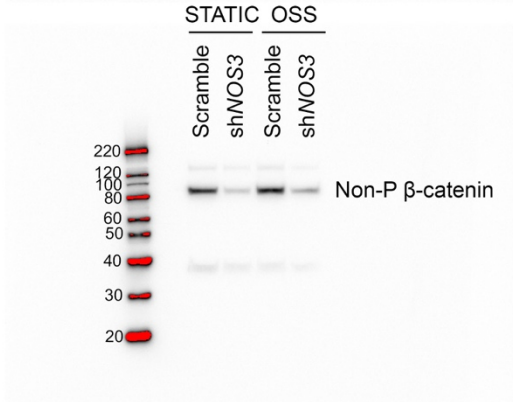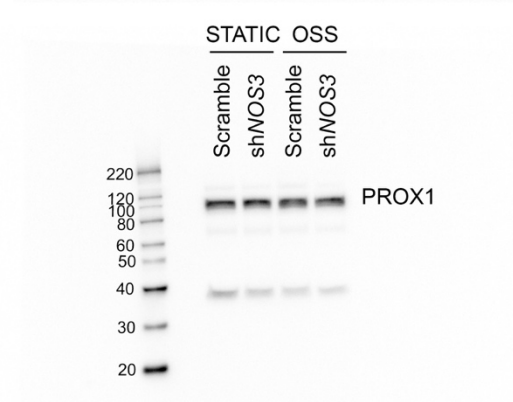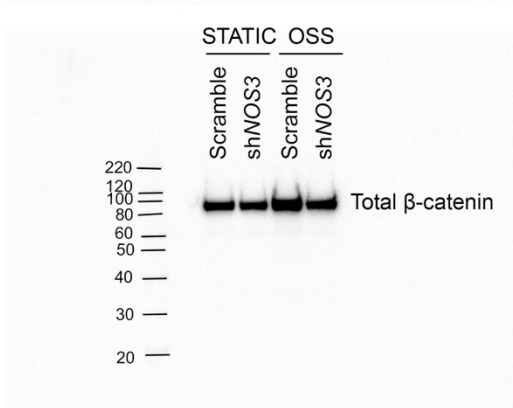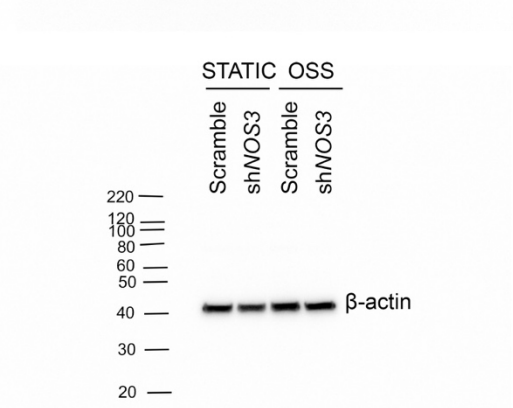

Full unedited blots for quantification in Figure 5D (n=3)

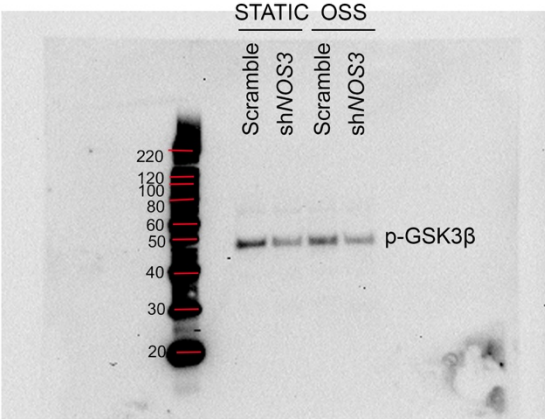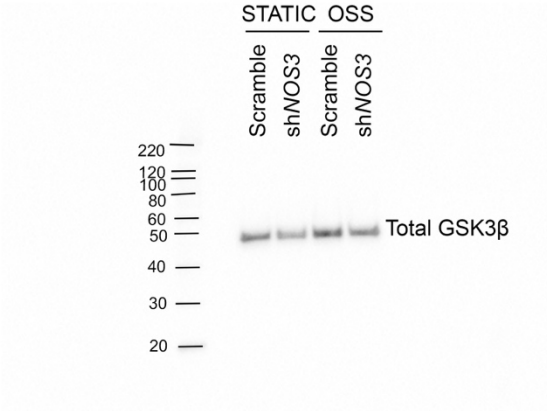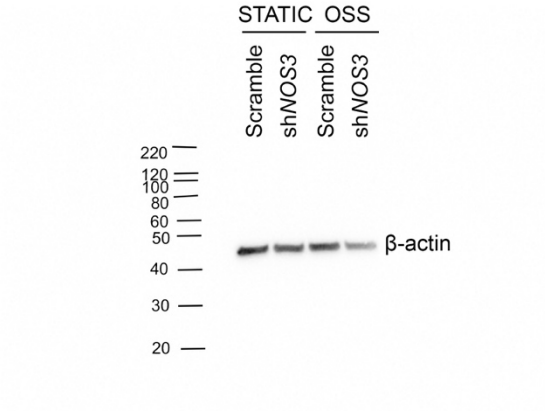



Full unedited blots for quantification in Figure 4D and Figure 5D (n=4)

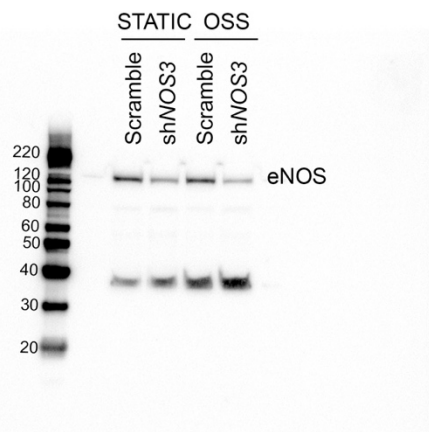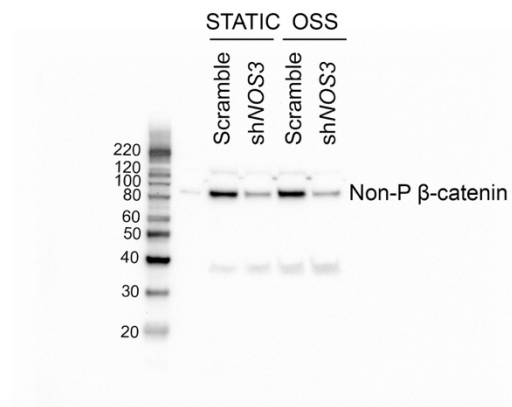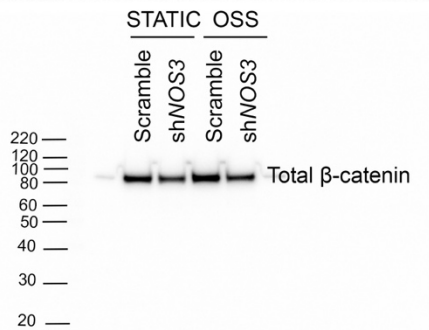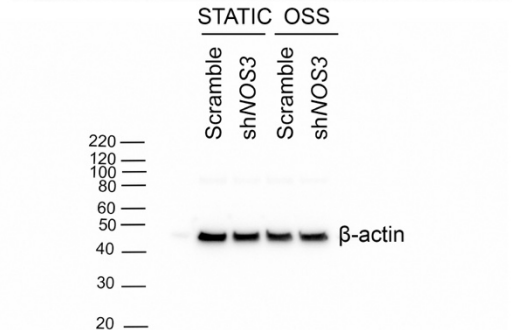

# Full unedited blots for Supplemental Figure 2A

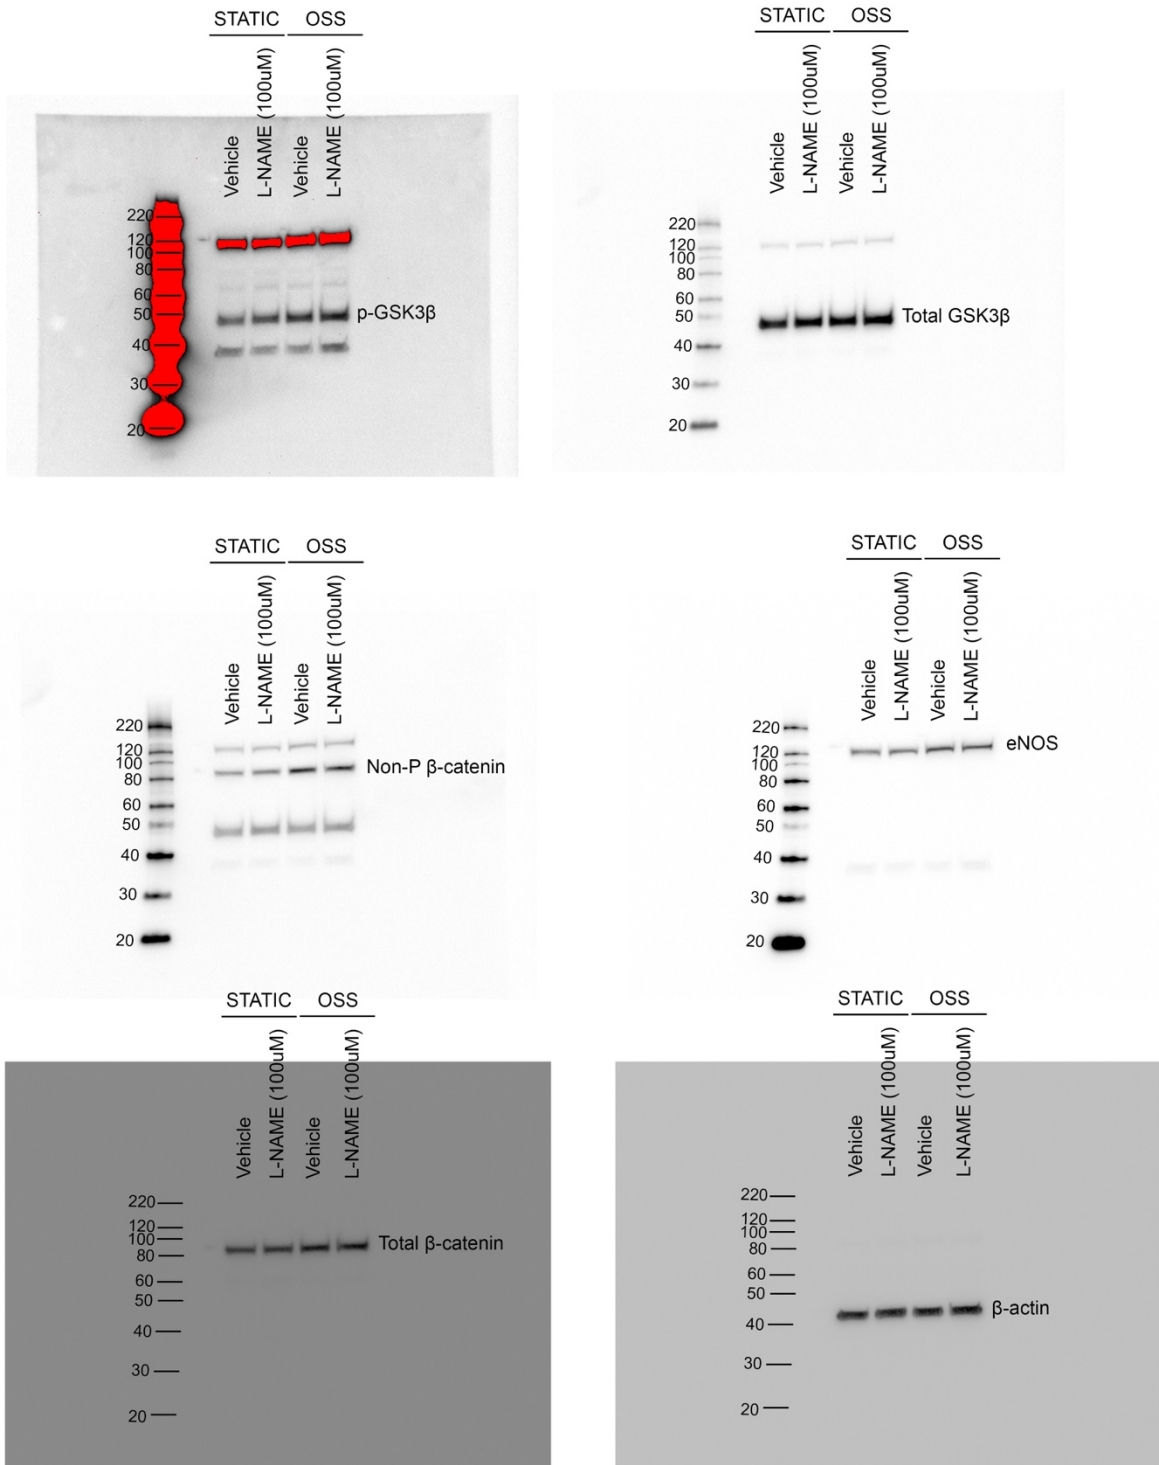

Full unedited blots for Supplemental Figure 2B

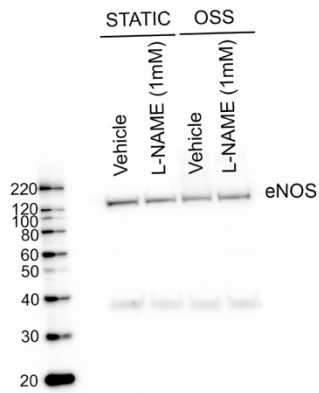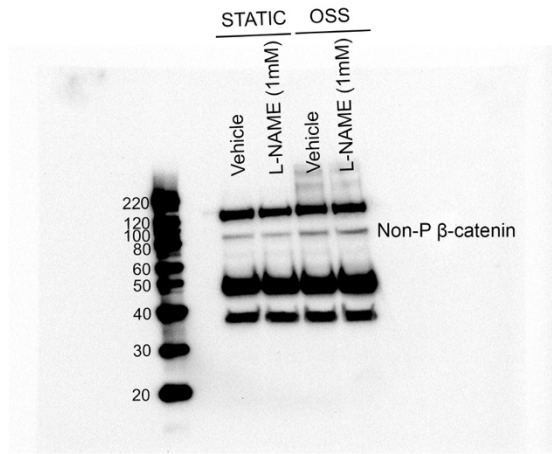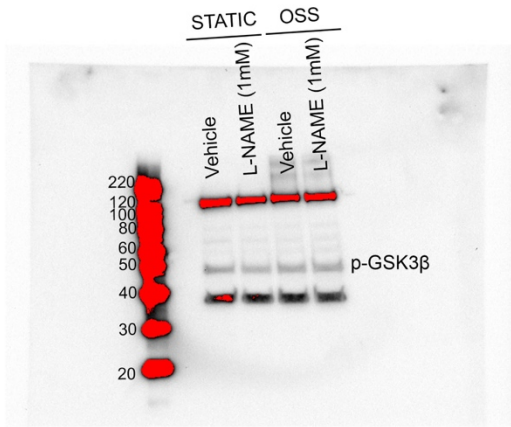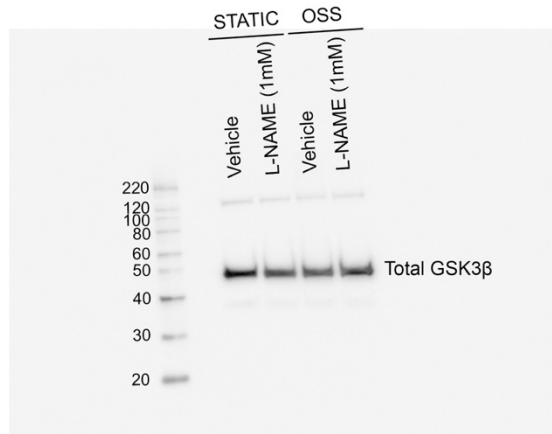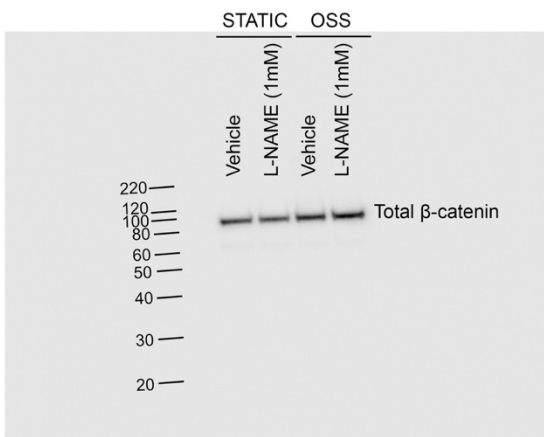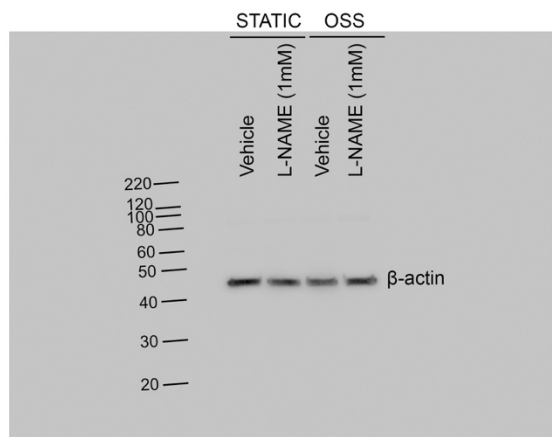

Full unedited blots for Supplemental Figure 2C

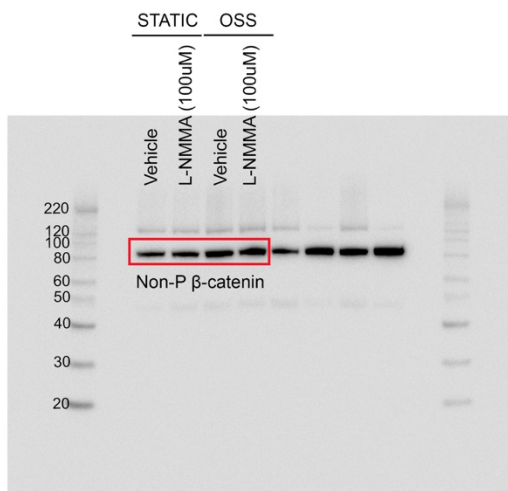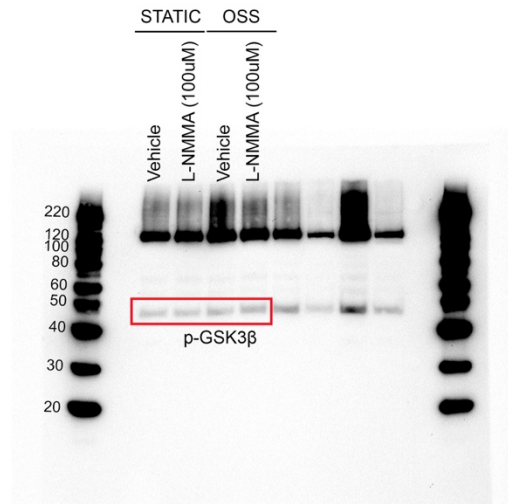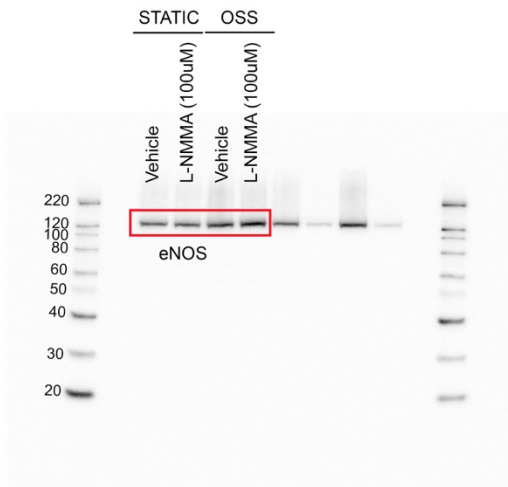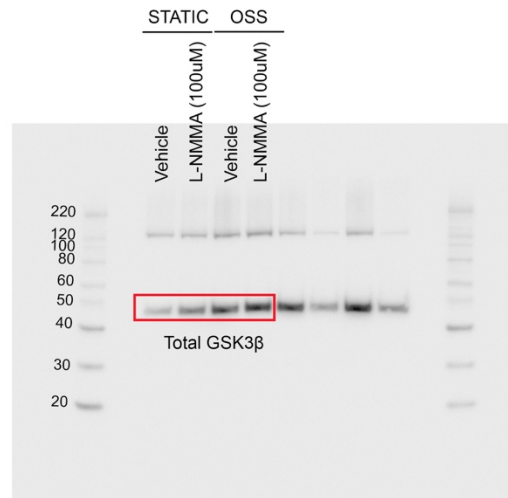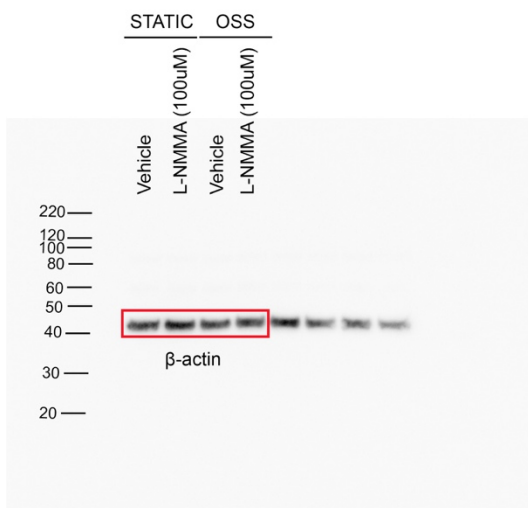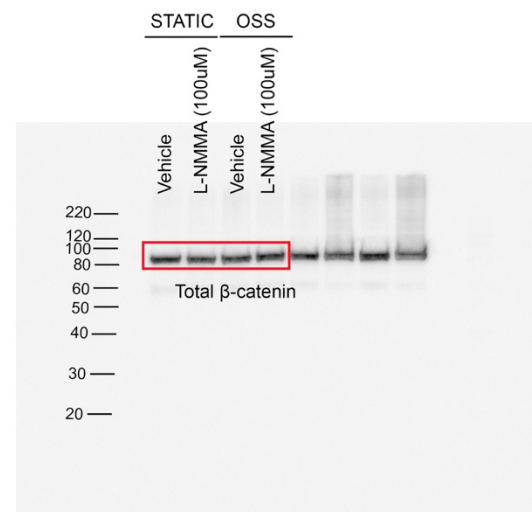

Full unedited blots for Supplemental Figure 2D

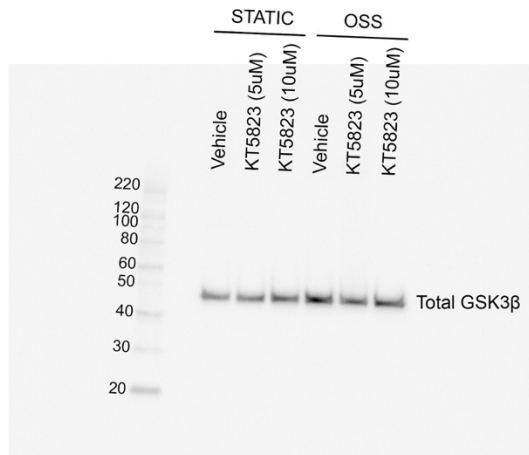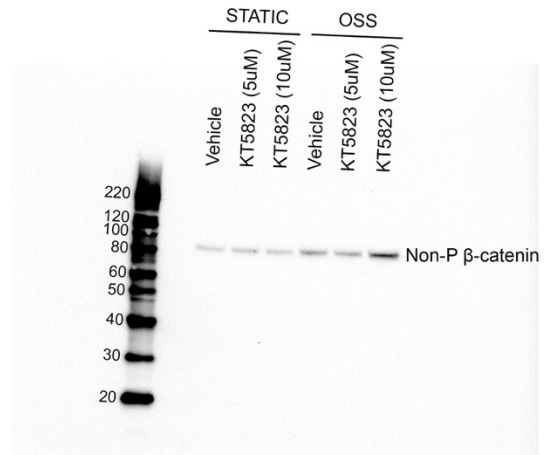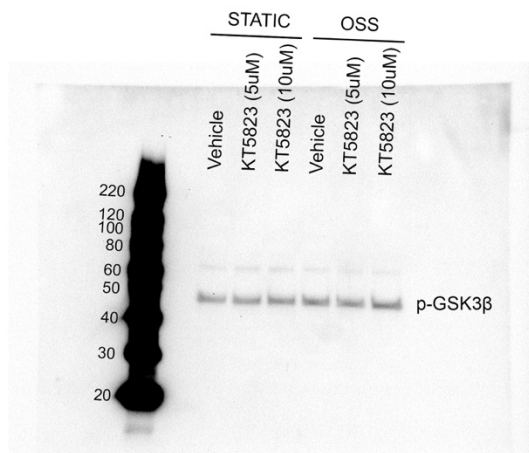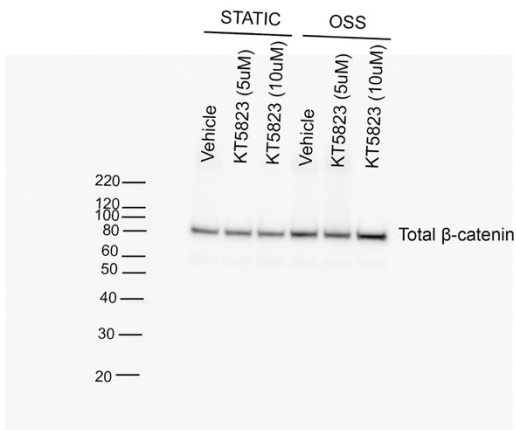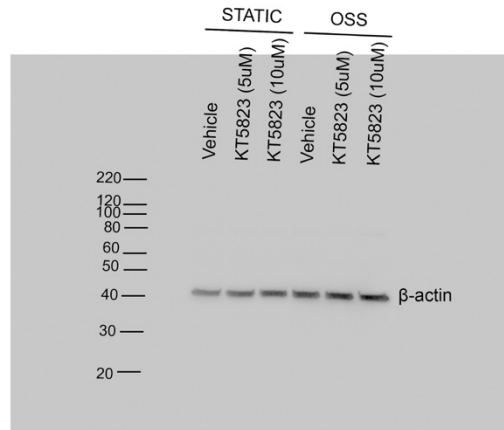

Supplement: NIHMS1931602-supplement-Unedited_Western_Blots.pdf [file NIHMS1931602-supplement-Unedited_Western_Blots.pdf]
