# Supplementary material
Source: PubMed Central journal article supplement (PMC10655861)
Supplement: NIHMS1931602-supplement-Supplemental_Publication_Material.pdf [file NIHMS1931602-supplement-Supplemental_Publication_Material.pdf]

## SUPPLEMENTAL MATERIALS

### **Endothelial Nitric Oxide Synthase Regulates Lymphatic Valve Specification By Controlling $\beta$ - catenin Signaling During Embryogenesis in Mice**

Drishya Iyer, Diandra M. Mastrogiacomo, Kunyu Li, Richa Banerjee, Ying Yang, Joshua P. Scallan

#### Affiliations:

Department of Molecular Pharmacology and Physiology, Morsani College of Medicine,  
University of South Florida, Tampa, FL USA 33612

#### Keywords:

VE-cadherin, FOXO1, mechanotransduction, shear stress, lymph flow

Please address correspondence to:

Joshua Scallan, Ph.D.

Dept. of Molecular Pharmacology and Physiology

University of South Florida

12901 Bruce B Downs Blvd, MDC8

Tampa, FL 33612

Telephone: (813) 974-2770

Email: [jscallan@usf.edu](mailto:jscallan@usf.edu)

## Supplemental Figure 1

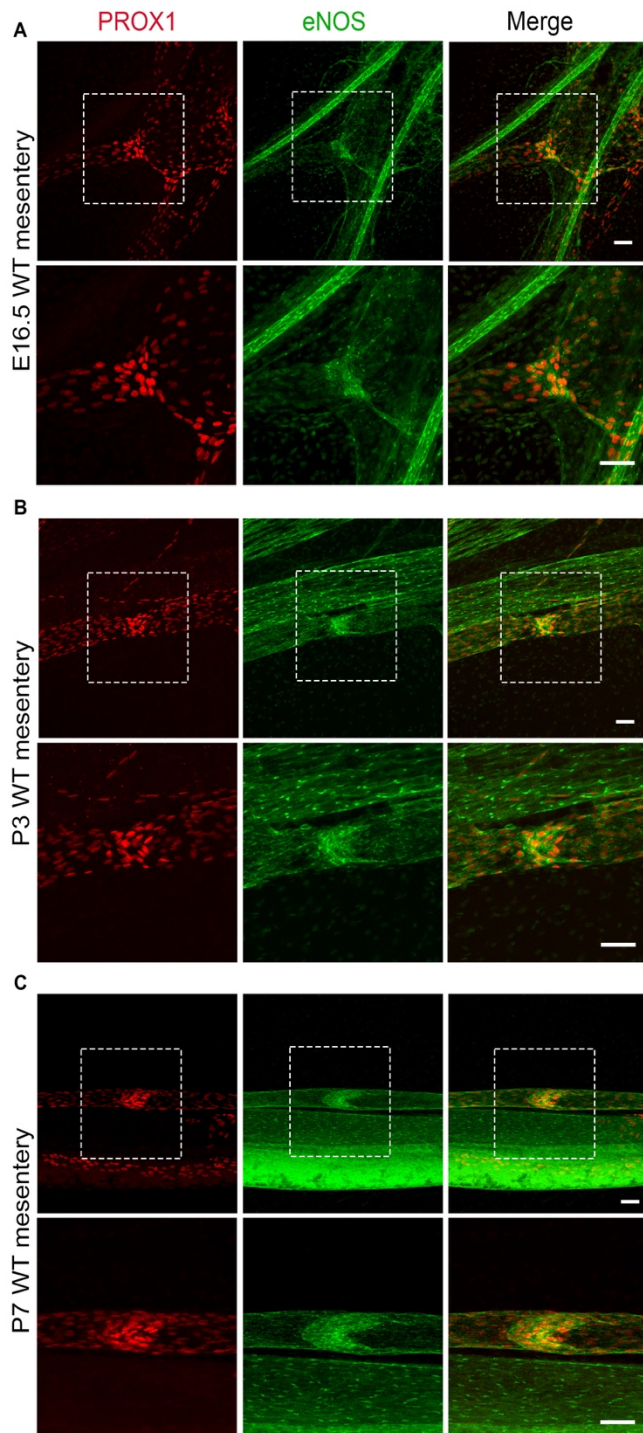

Figure S1: eNOS is highly expressed in developing and mature lymphatic valves. (A-C) Whole-mount immunostaining of PROX1 (red) and eNOS (green) in WT mesenteries at E16.5, P3 and P7. The bottom images are high-magnification images of the white boxed areas. Scale bars are 50 $\mu$ m in A-C.

## Supplemental Figure 2

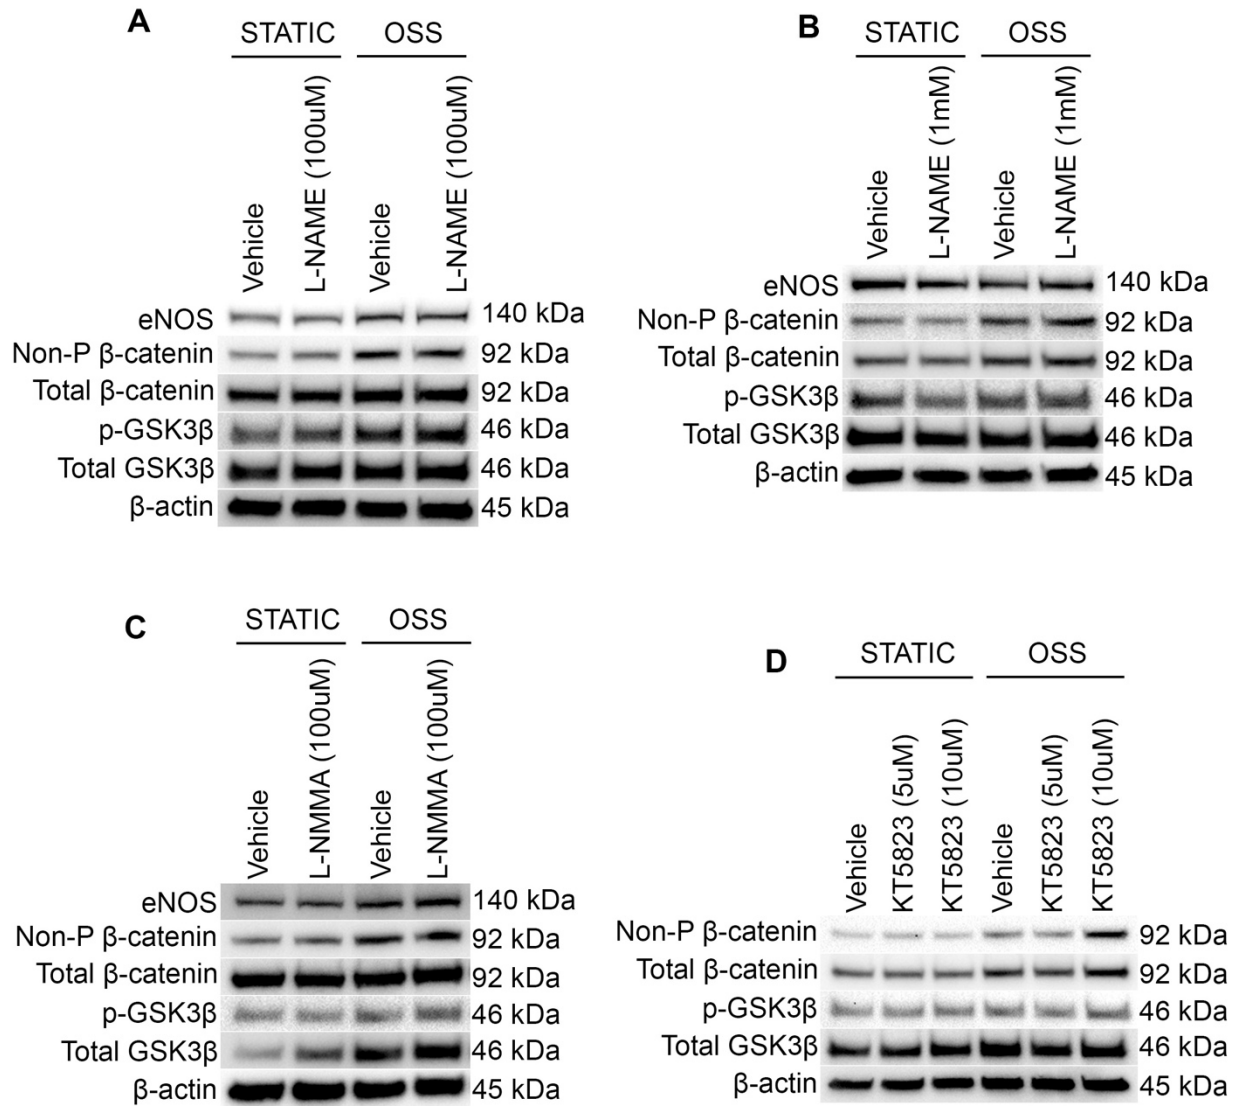

Figure S2: eNOS regulates β-catenin signaling independent of NO production.

(A-D) Western blot for the indicated proteins using lysates from hdLECs exposed to static or OSS conditions and treated with vehicle or (A) 100μM L-NAME, (B) 1mM L-NAME, (C) 100μM L-NMMA, and (D) 5μM or 10μM KT5823.

### Supplemental Figure 3

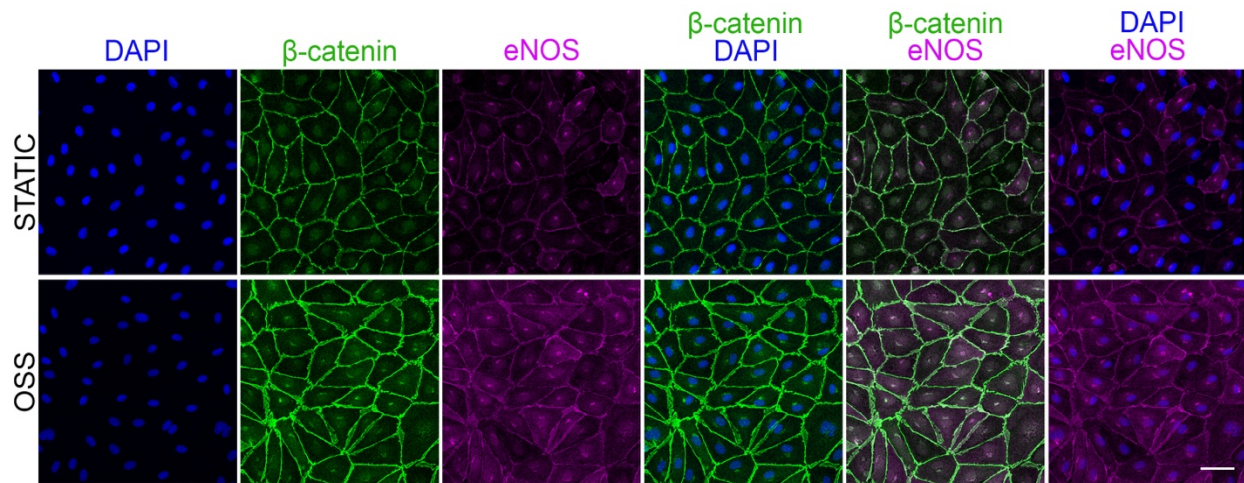

Figure S3: eNOS and  $\beta$ -catenin colocalize at the cell membrane and golgi. Immunostaining of DAPI (blue),  $\beta$ -catenin (green) and eNOS (magenta) in hdLECs cultured under static or OSS conditions for 48 hours were imaged with confocal microscopy. Scale bar is 50 $\mu$ m.

## Supplemental Figure 4

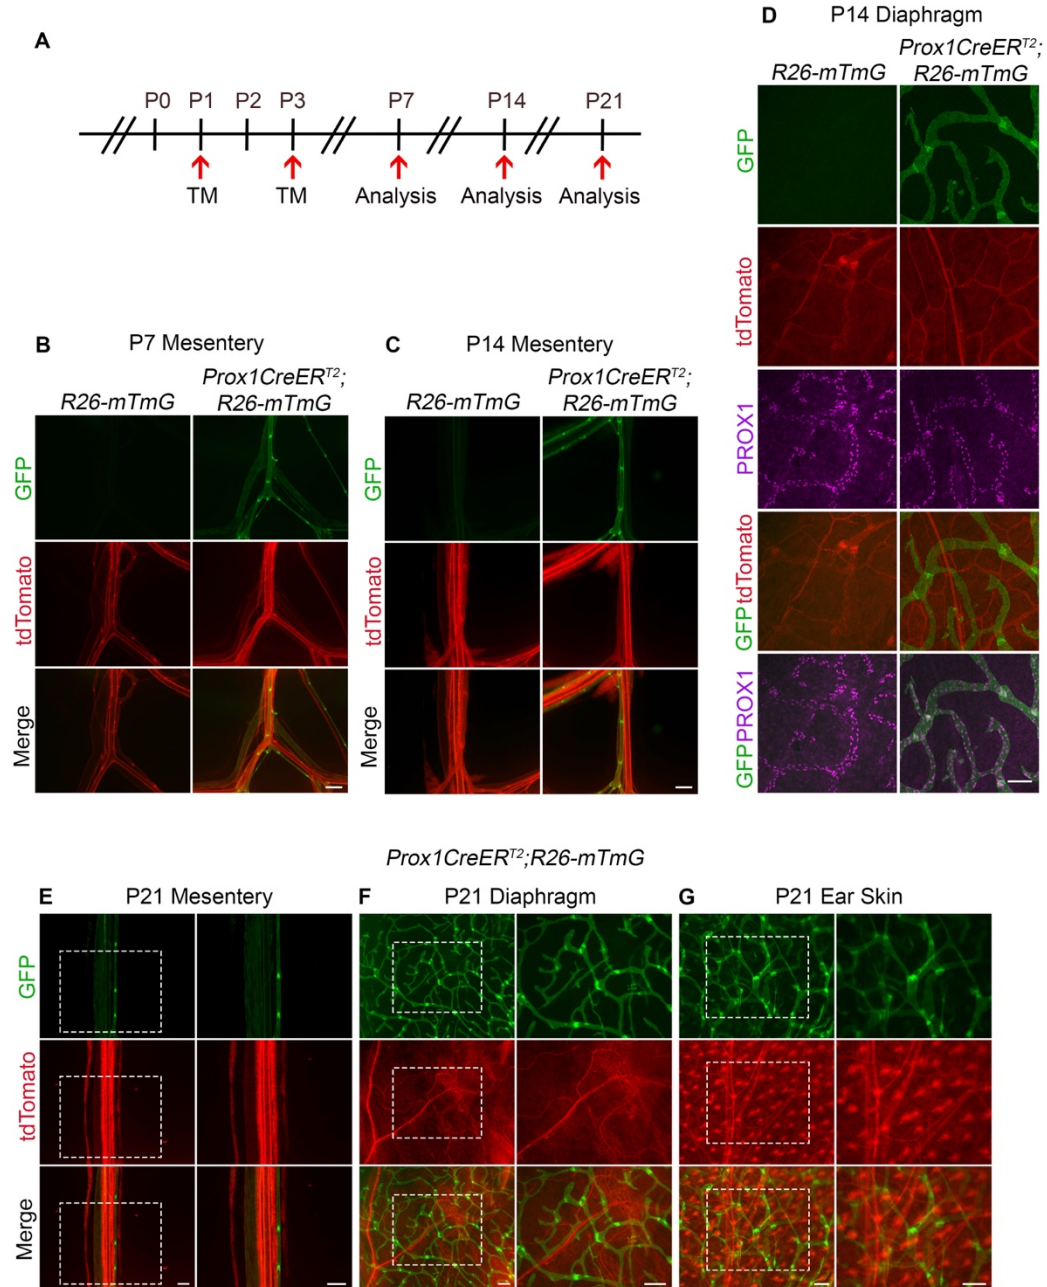

Figure S4: *Prox1CreER<sup>T2</sup>* (Jscal) shows 100% recombination efficiency in a lymphatic-specific manner.

(A) Tamoxifen injection schedule to evaluate Cre-mediated recombination of reporter gene. (B,C) Fluorescence imaging of mesenteries from *R26-mTmG* littermates with and without *Prox1CreER<sup>T2</sup>* (Jscal) at (B) P7 and (C) P14. (D) Whole-mount immunostaining of diaphragms from *R26-mTmG* littermates with and without *Prox1CreER<sup>T2</sup>* (Jscal) at P14. (E-G) Fluorescence imaging of *Prox1CreER<sup>T2</sup>;R26mTmG* (Jscal) mesentery, diaphragm, and ear skin at P21. The images on the right are high-magnification images of the white boxed areas. Scale bars are 300 $\mu$ m in B-C and E, 100 $\mu$ m in D and 150 $\mu$ m in F-G.

## Supplemental Figure 5

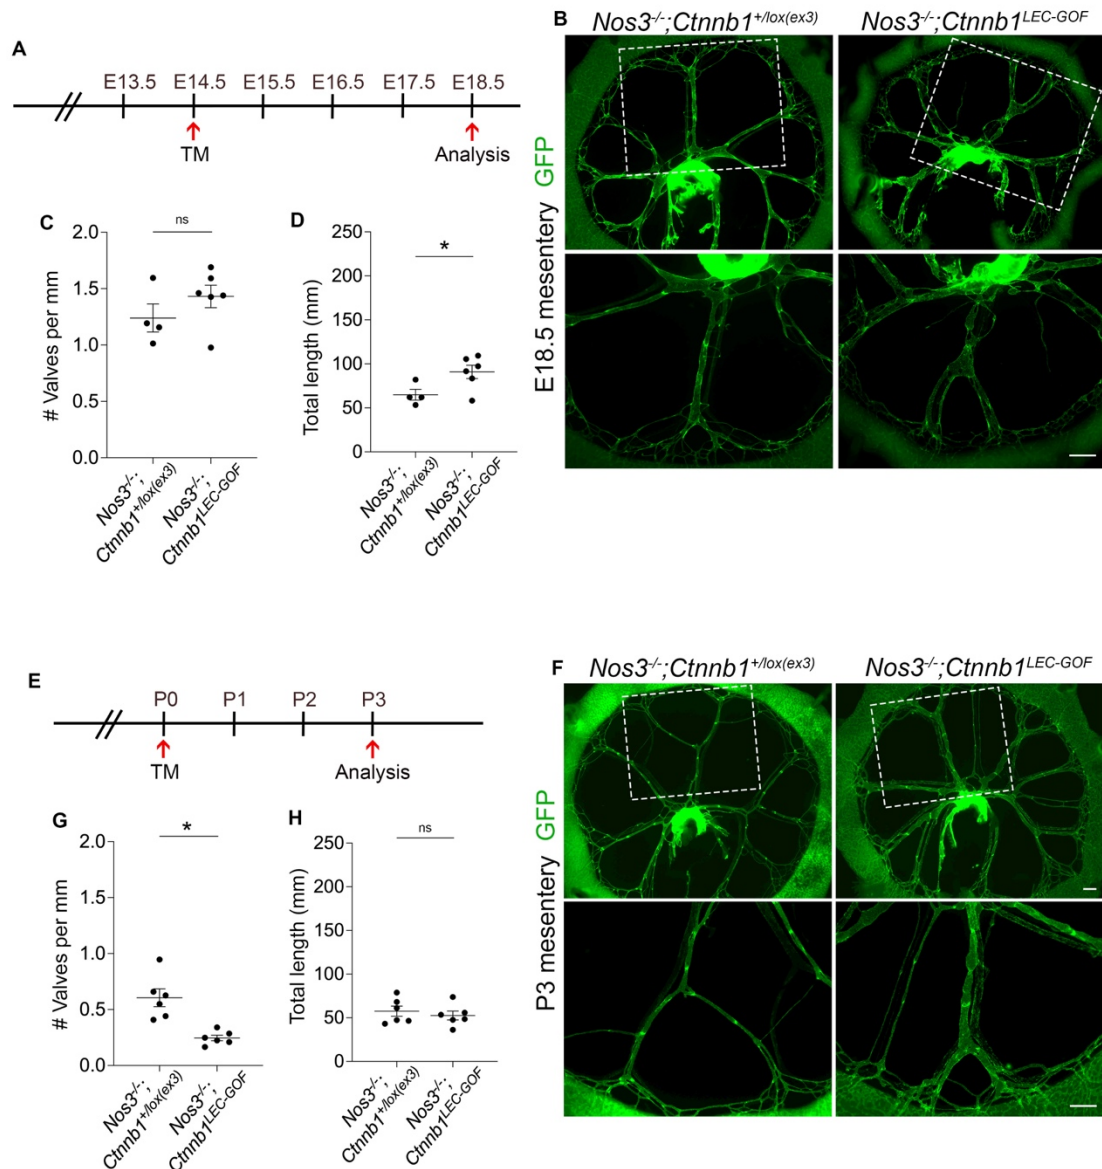

Figure S5:  $\beta$ -catenin gain-of-function signaling does not rescue valve loss in *Nos3<sup>-/-</sup>* mice. (A) Tamoxifen injection schedule for embryonic deletion of *Ctnnb1* exon 3. (B) Fluorescence imaging of E18.5 *Prox1-GFP* (green) mesenteries from *Nos3<sup>-/-</sup>;Ctnnb1<sup>LEC-GOF</sup>* and control littermates lacking *Prox1CreERT2* (Jscal). (C) Valves per millimeter from each mesentery at E18.5. (D) Total length of lymphatic vessels from each mesentery at E18.5. (E) Tamoxifen injection schedule for postnatal deletion of exon 3 of *Ctnnb1*. (F) Fluorescence imaging of *Prox1-GFP* (green) mesenteries from *Nos3<sup>-/-</sup>;Ctnnb1<sup>LEC-GOF</sup>* and control littermates lacking *Prox1CreERT2* (Jscal) at P3. (G) Valves per millimeter from each mesentery at P3. (H) Total length of lymphatic vessels from each mesentery at P3. All values are means  $\pm$  SEM of n=4-6 littermates per

genotype. \*P<0.05, unpaired Student's t-test. Scale bars are 500µm in B and F. Sex was not determined and data from both sexes were combined.

### Major Resources Table

In order to allow validation and replication of experiments, all essential research materials listed in the Methods should be included in the Major Resources Table below. Authors are encouraged to use public repositories for protocols, data, code, and other materials and provide persistent identifiers and/or links to repositories when available. Authors may add or delete rows as needed.

#### Animals (in vivo studies)

| Species | Vendor or Source     | Background Strain | Sex    | Persistent ID / URL  |
|---------|----------------------|-------------------|--------|----------------------|
| Mouse   | Jackson Laboratories | C57Bl6/J          | Male   | RRID:IMSR_JAX:000664 |
| Mouse   | Jackson Laboratories | C57Bl6/J          | Female | RRID:IMSR_JAX:000664 |

#### Genetically Modified Animals

|                          | Species | Vendor or Source      | Background Strain | Other Information                             | Persistent ID / URL  |
|--------------------------|---------|-----------------------|-------------------|-----------------------------------------------|----------------------|
| Parent – Male and Female | Mouse   | Jackson Laboratories  | C57Bl6/J          | <i>Nos3</i> <sup>-/-</sup>                    | RRID:IMSR_JAX:002684 |
| Parent – Male and Female | Mouse   | Choi et al. (2011)    | C57Bl6/J          | <i>Prox1-GFP</i>                              | RRID:MGI:5004059     |
| Parent – Male and Female | Mouse   | Jackson Laboratories  | C57Bl6/J          | <i>Ctnnb1</i> <sup>fl<sup>ox</sup></sup>      | RRID:MGI:5909093     |
| Parent – Male and Female | Mouse   | Bazigou et al. (2011) | C57Bl6/J          | <i>Prox1CreER</i> <sup>T2</sup> (Tmak)        | RRID:MGI:6438646     |
| Parent – Male and Female | Mouse   | Harada et al. (1999)  | C57Bl6/J          | <i>Ctnnb1</i> <sup>ex3(l<sup>oxP</sup>)</sup> | RRID:MGI:2673885     |
| Parent – Male and Female | Mouse   | Jackson Laboratories  | C57Bl6/J          | <i>Foxo1</i> <sup>fl<sup>ox</sup></sup>       | RRID:MGI:6275124     |
| Parent – Male and Female | Mouse   | This paper            | C57Bl6/J          | <i>Prox1CreER</i> <sup>T2</sup> (Jscal)       | N/A                  |

#### Antibodies

| Target antigen         | Vendor or Source | Catalog # | Working concentration                                                                         | Persistent ID / URL |
|------------------------|------------------|-----------|-----------------------------------------------------------------------------------------------|---------------------|
| PROX1                  | Abcam            | ab101851  | 1:500 ( <i>In vivo</i> immunostaining)                                                        | RRID:AB_10712211    |
| eNOS                   | Abcam            | ab199956  | 1:500 ( <i>In vivo</i> immunostaining)<br>1:1000 (Western blot)<br>1:100 (Co-IP western blot) | N/A                 |
| Phospho-eNOS (Ser1177) | Cell Signaling   | 9571      | 1:500 ( <i>In vivo</i> immunostaining)<br>1:200 (Western blot)                                | RRID:AB_329837      |
| AKT                    | Cell Signaling   | 4691      | 1:500                                                                                         | RRID:AB_915783      |

|                                              |                   |            |                                                                                          |                  |
|----------------------------------------------|-------------------|------------|------------------------------------------------------------------------------------------|------------------|
| eNOS                                         | Cell Signaling    | 32027      | 1:250 ( <i>In vitro</i> immunostaining and PLA)                                          | RRID:AB_2728756  |
| IgG                                          | Cell Signaling    | 5415       | 3.5µg                                                                                    | N/A              |
| Phospho-AKT (Ser473)                         | Cell Signaling    | 4060       | 1:500                                                                                    | RRID:AB_2315049  |
| β-Actin                                      | Cell Signaling    | 3700       | 1:5000                                                                                   | RRID:AB_2242334  |
| PROX1                                        | R&D Systems       | AF2727     | 1:500 ( <i>In vivo</i> immunostaining)                                                   | RRID:AB_2170716  |
| Alexa488-conjugated anti-GFP                 | Life Technologies | A21311     | 1:1000                                                                                   | RRID:AB_221477   |
| FOXC2                                        | R&D Systems       | AF6989     | 1:500 ( <i>In vivo</i> immunostaining)                                                   | RRID:AB_10973139 |
| VE-cadherin                                  | BD Pharmingen     | 550548     | 1:500                                                                                    | RRID:AB_2244723  |
| FOXC2                                        | Santa Cruz        | sc515234   | 1:100 (Western blot)                                                                     | N/A              |
| PROX1                                        | Proteintech       | 11067-2-AP | 1:500 (Western blot)                                                                     | RRID:AB_2268804  |
| Non-phospho β-Catenin (Ser33/37/Thr41)       | Cell Signaling    | 8814       | 1:500 ( <i>In vivo</i> immunostaining and western blot)                                  | RRID:AB_11127203 |
| β-Catenin                                    | Cell Signaling    | 2677       | 1:250 ( <i>In vitro</i> immunostaining and PLA)<br>1:500 (Western blot)<br>3.5µg (Co-IP) | RRID:AB_1030943  |
| Phospho-GSK3β (Ser9)                         | Cell Signaling    | 9336       | 1:200                                                                                    | RRID:AB_331405   |
| GSK3β                                        | Cell Signaling    | 12456      | 1:1000                                                                                   | RRID:AB_2636978  |
| Alexa Fluor 488 Donkey Anti-Rabbit IgG (H+L) | Invitrogen        | A-21206    | 1:300                                                                                    | RRID:AB_2535792  |
| Alexa Fluor 488 Donkey Anti-Goat IgG (H+L)   | Invitrogen        | A-11055    | 1:300                                                                                    | RRID:AB_2534102  |
| Alexa Fluor 488 Donkey Anti-Sheep IgG (H+L)  | Invitrogen        | A-11015    | 1:300                                                                                    | RRID:AB_2534082  |
| Alexa Fluor 488 Donkey Anti-Rat IgG (H+L)    | Invitrogen        | A-21208    | 1:300                                                                                    | RRID:AB_2535794  |
| Alexa Fluor 594 Donkey Anti-Rabbit IgG (H+L) | Invitrogen        | A-21207    | 1:300                                                                                    | RRID:AB_141637   |



|                                              |                                     |             |        |                 |
|----------------------------------------------|-------------------------------------|-------------|--------|-----------------|
| Alexa Fluor 594 Donkey Anti-Goat IgG (H+L)   | Invitrogen                          | A-11058     | 1:300  | RRID:AB_142540  |
| Alexa Fluor 594 Donkey Anti-Sheep IgG (H+L)  | Invitrogen                          | A-11016     | 1:300  | RRID:AB_2534083 |
| Alexa Fluor 594 Donkey Anti-Rat IgG (H+L)    | Invitrogen                          | A-21209     | 1:300  | RRID:AB_2535795 |
| Alexa Fluor 647 Donkey Anti-Rabbit IgG (H+L) | Invitrogen                          | A-31573     | 1:300  | RRID:AB_2536183 |
| Alexa Fluor 647 Donkey Anti-Goat IgG (H+L)   | Invitrogen                          | A-21447     | 1:300  | RRID:AB_141844  |
| Alexa Fluor 647 Donkey Anti-Rat IgG (H+L)    | Jackson ImmunoResearch Laboratories | 712-605-153 | 1:300  | RRID:AB_2340694 |
| Donkey anti-Rabbit IgG (H+L) HRP             | Invitrogen                          | A-16035     | 1:2000 | RRID:AB_2534709 |
| Donkey anti-Mouse IgG (H+L) HRP              | Invitrogen                          | A-16017     | 1:2000 | RRID:AB_2534691 |

### DNA/cDNA Clones

| Clone Name | Sequence              | Source / Repository | Persistent ID / URL |
|------------|-----------------------|---------------------|---------------------|
| shNOS3     | CCGGAACAGCACAAGAGTTAT | VectorBuilder Inc.  |                     |

### Cultured Cells

| Name                                                       | Vendor or Source    | Sex (F, M, or unknown) | Persistent ID / URL                                                                                                                                                       |
|------------------------------------------------------------|---------------------|------------------------|---------------------------------------------------------------------------------------------------------------------------------------------------------------------------|
| Human neonatal dermal lymphatic endothelial cells (hdLECs) | PromoCell (C-12216) | M                      | <a href="https://promocell.com/product/human-dermal-lymphatic-endothelial-cells-hdlec/">https://promocell.com/product/human-dermal-lymphatic-endothelial-cells-hdlec/</a> |

### Other

| Description       | Source / Repository                 | Catalog #               | Persistent ID / URL                                                                                                                                                                                                                                                                                                                                                                                                                                                                                                                                                 |
|-------------------|-------------------------------------|-------------------------|---------------------------------------------------------------------------------------------------------------------------------------------------------------------------------------------------------------------------------------------------------------------------------------------------------------------------------------------------------------------------------------------------------------------------------------------------------------------------------------------------------------------------------------------------------------------|
| Tamoxifen         | Sigma-Aldrich                       | T5648                   | <a href="https://www.sigmaaldrich.com/US/en/product/sigma/t5648">https://www.sigmaaldrich.com/US/en/product/sigma/t5648</a>                                                                                                                                                                                                                                                                                                                                                                                                                                         |
| Donkey Serum      | Jackson ImmunoResearch Laboratories | 017-000-001             | <a href="https://www.jacksonimmuno.com/catalog/products/017-000-001">https://www.jacksonimmuno.com/catalog/products/017-000-001</a>                                                                                                                                                                                                                                                                                                                                                                                                                                 |
| Human Fibronectin | Corning                             | 354008                  | <a href="https://ecatalog.corning.com/life-sciences/b2c/US/en/Surfaces/Extracellular-Matrices-ECMs/Corning%20AE-Fibronectin/p/354008#:~:text=Product%20Number354008&amp;text=Corning%20AE%20Fibronectin%2C%20human%2C%201%20mg%2C%20is%20used%20as,a%20variety%20of%20cell%20types.">https://ecatalog.corning.com/life-sciences/b2c/US/en/Surfaces/Extracellular-Matrices-ECMs/Corning%20AE-Fibronectin/p/354008#:~:text=Product%20Number354008&amp;text=Corning%20AE%20Fibronectin%2C%20human%2C%201%20mg%2C%20is%20used%20as,a%20variety%20of%20cell%20types.</a> |
| SC-79             | Millipore                           | 123871; CAS 305834-79-1 | <a href="https://www.emdmillipore.com/US/en/product/Akt-Activator-II-SC79-CAS-305834-79-1-Calbiochem,EMD_BIO-123871">https://www.emdmillipore.com/US/en/product/Akt-Activator-II-SC79-CAS-305834-79-1-Calbiochem,EMD_BIO-123871</a>                                                                                                                                                                                                                                                                                                                                 |

|                                           |                   |                       |                                                                                                                                                     |
|-------------------------------------------|-------------------|-----------------------|-----------------------------------------------------------------------------------------------------------------------------------------------------|
| NG-Monomethyl-L-arginine acetate (L-NMMA) | R&D Systems       | 0771; CAS 53308-83-1  | <a href="https://www.rndsystems.com/products/l-nmma-acetate_0771">https://www.rndsystems.com/products/l-nmma-acetate_0771</a>                       |
| KT5823                                    | R&D Systems       | 1289; CAS 126643-37-6 | <a href="https://www.rndsystems.com/products/kt-5823_1289">https://www.rndsystems.com/products/kt-5823_1289</a>                                     |
| NG-Nitro-L-arginine methyl ester (L-NAME) | R&D Systems       | 0665; CAS 51298-62-5  | <a href="https://www.rndsystems.com/products/l-name-hydrochloride_0665">https://www.rndsystems.com/products/l-name-hydrochloride_0665</a>           |
| Endothelial Cell Growth Medium MV 2 Kit   | PromoCell         | C-22121               | <a href="https://promocell.com/product/endothelial-cell-growth-medium-mv-2/">https://promocell.com/product/endothelial-cell-growth-medium-mv-2/</a> |
| Duolink Proximity Ligation Assay Kit      | Millipore         | DUO92101              | <a href="https://www.sigmaaldrich.com/US/en/product/sigma/duo92101">https://www.sigmaaldrich.com/US/en/product/sigma/duo92101</a>                   |
| Pierce Co-Immunoprecipitation Kit         | Thermo Scientific | 26149                 | <a href="https://www.thermofisher.com/order/catalog/product/26149">https://www.thermofisher.com/order/catalog/product/26149</a>                     |

## ARRIVE GUIDELINES

The ARRIVE guidelines (<https://arriveguidelines.org/>) are a checklist of recommendations to improve the reporting of research involving animals. Key elements of the study design should be included below to better enable readers to scrutinize the research adequately, evaluate its methodological rigor, and reproduce the methods or findings.

### Study Design

| Groups          | Sex           | Age                       | Number (prior to experiment) | Number (after termination) | Littermates (Yes/No) | Other description                             |
|-----------------|---------------|---------------------------|------------------------------|----------------------------|----------------------|-----------------------------------------------|
| Control Group   | Not available | Embryos or postnatal pups | Whole litter                 | Whole litter               | Yes                  | Wild-type or floxed controls                  |
| Treatment Group | Not available | Embryos or postnatal pups | Whole litter                 | Whole litter               | Yes                  | Global knockout or LEC-specific knockout mice |

**Sample Size:** Please explain how the sample size was decided Please provide details of any a *prior* sample size calculation, if done.

All n-numbers are stated in each figure legend. A power analysis was performed based on a pilot study to determine sample size. Using  $\alpha=0.05$  and a power  $(1-\beta)=0.8$ , a sample size of  $n=9$  was used to detect a  $\geq 40\%$  difference in PROX1<sup>high</sup> specification clusters from control levels, and a sample size of  $n=6$  will be used to detect a  $\geq 50\%$  difference in valve number from control levels. For *in vitro* experiments, a sample size of  $n=3-4$  independent experiments was performed.

### Inclusion Criteria

All mice in a litter were used, regardless of sex.

### Exclusion Criteria

None.

### Randomization

None.

### Blinding

None.
